# Supplementary material for: Matrix Polysaccharides and SiaD Diguanylate Cyclase Alter Community Structure and Competitiveness of Pseudomonas aeruginosa during Dual-Species Biofilm Development with Staphylococcus aureus
Source: PubMed Central journal article supplement (PMC6222129; doi:10.1128/mbio.00585-18), 2018-11-06

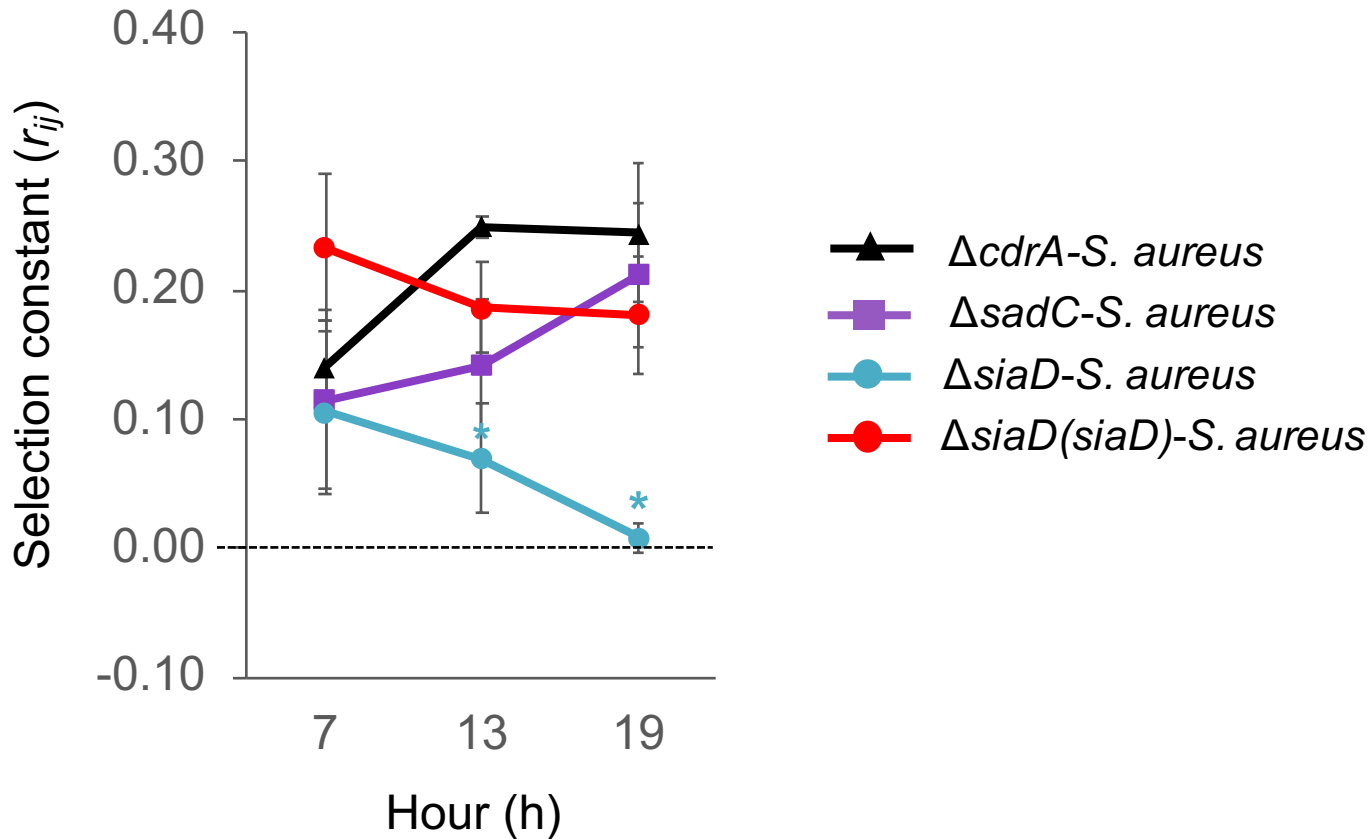

Supplement: mbo005184153sf2.pdf [file mbo005184153sf2.pdf]
